# Supplementary material
Source: publisher figshare collection journal article supplement (https://gsapubs.figshare.com/articles/dataset/_/12473336)

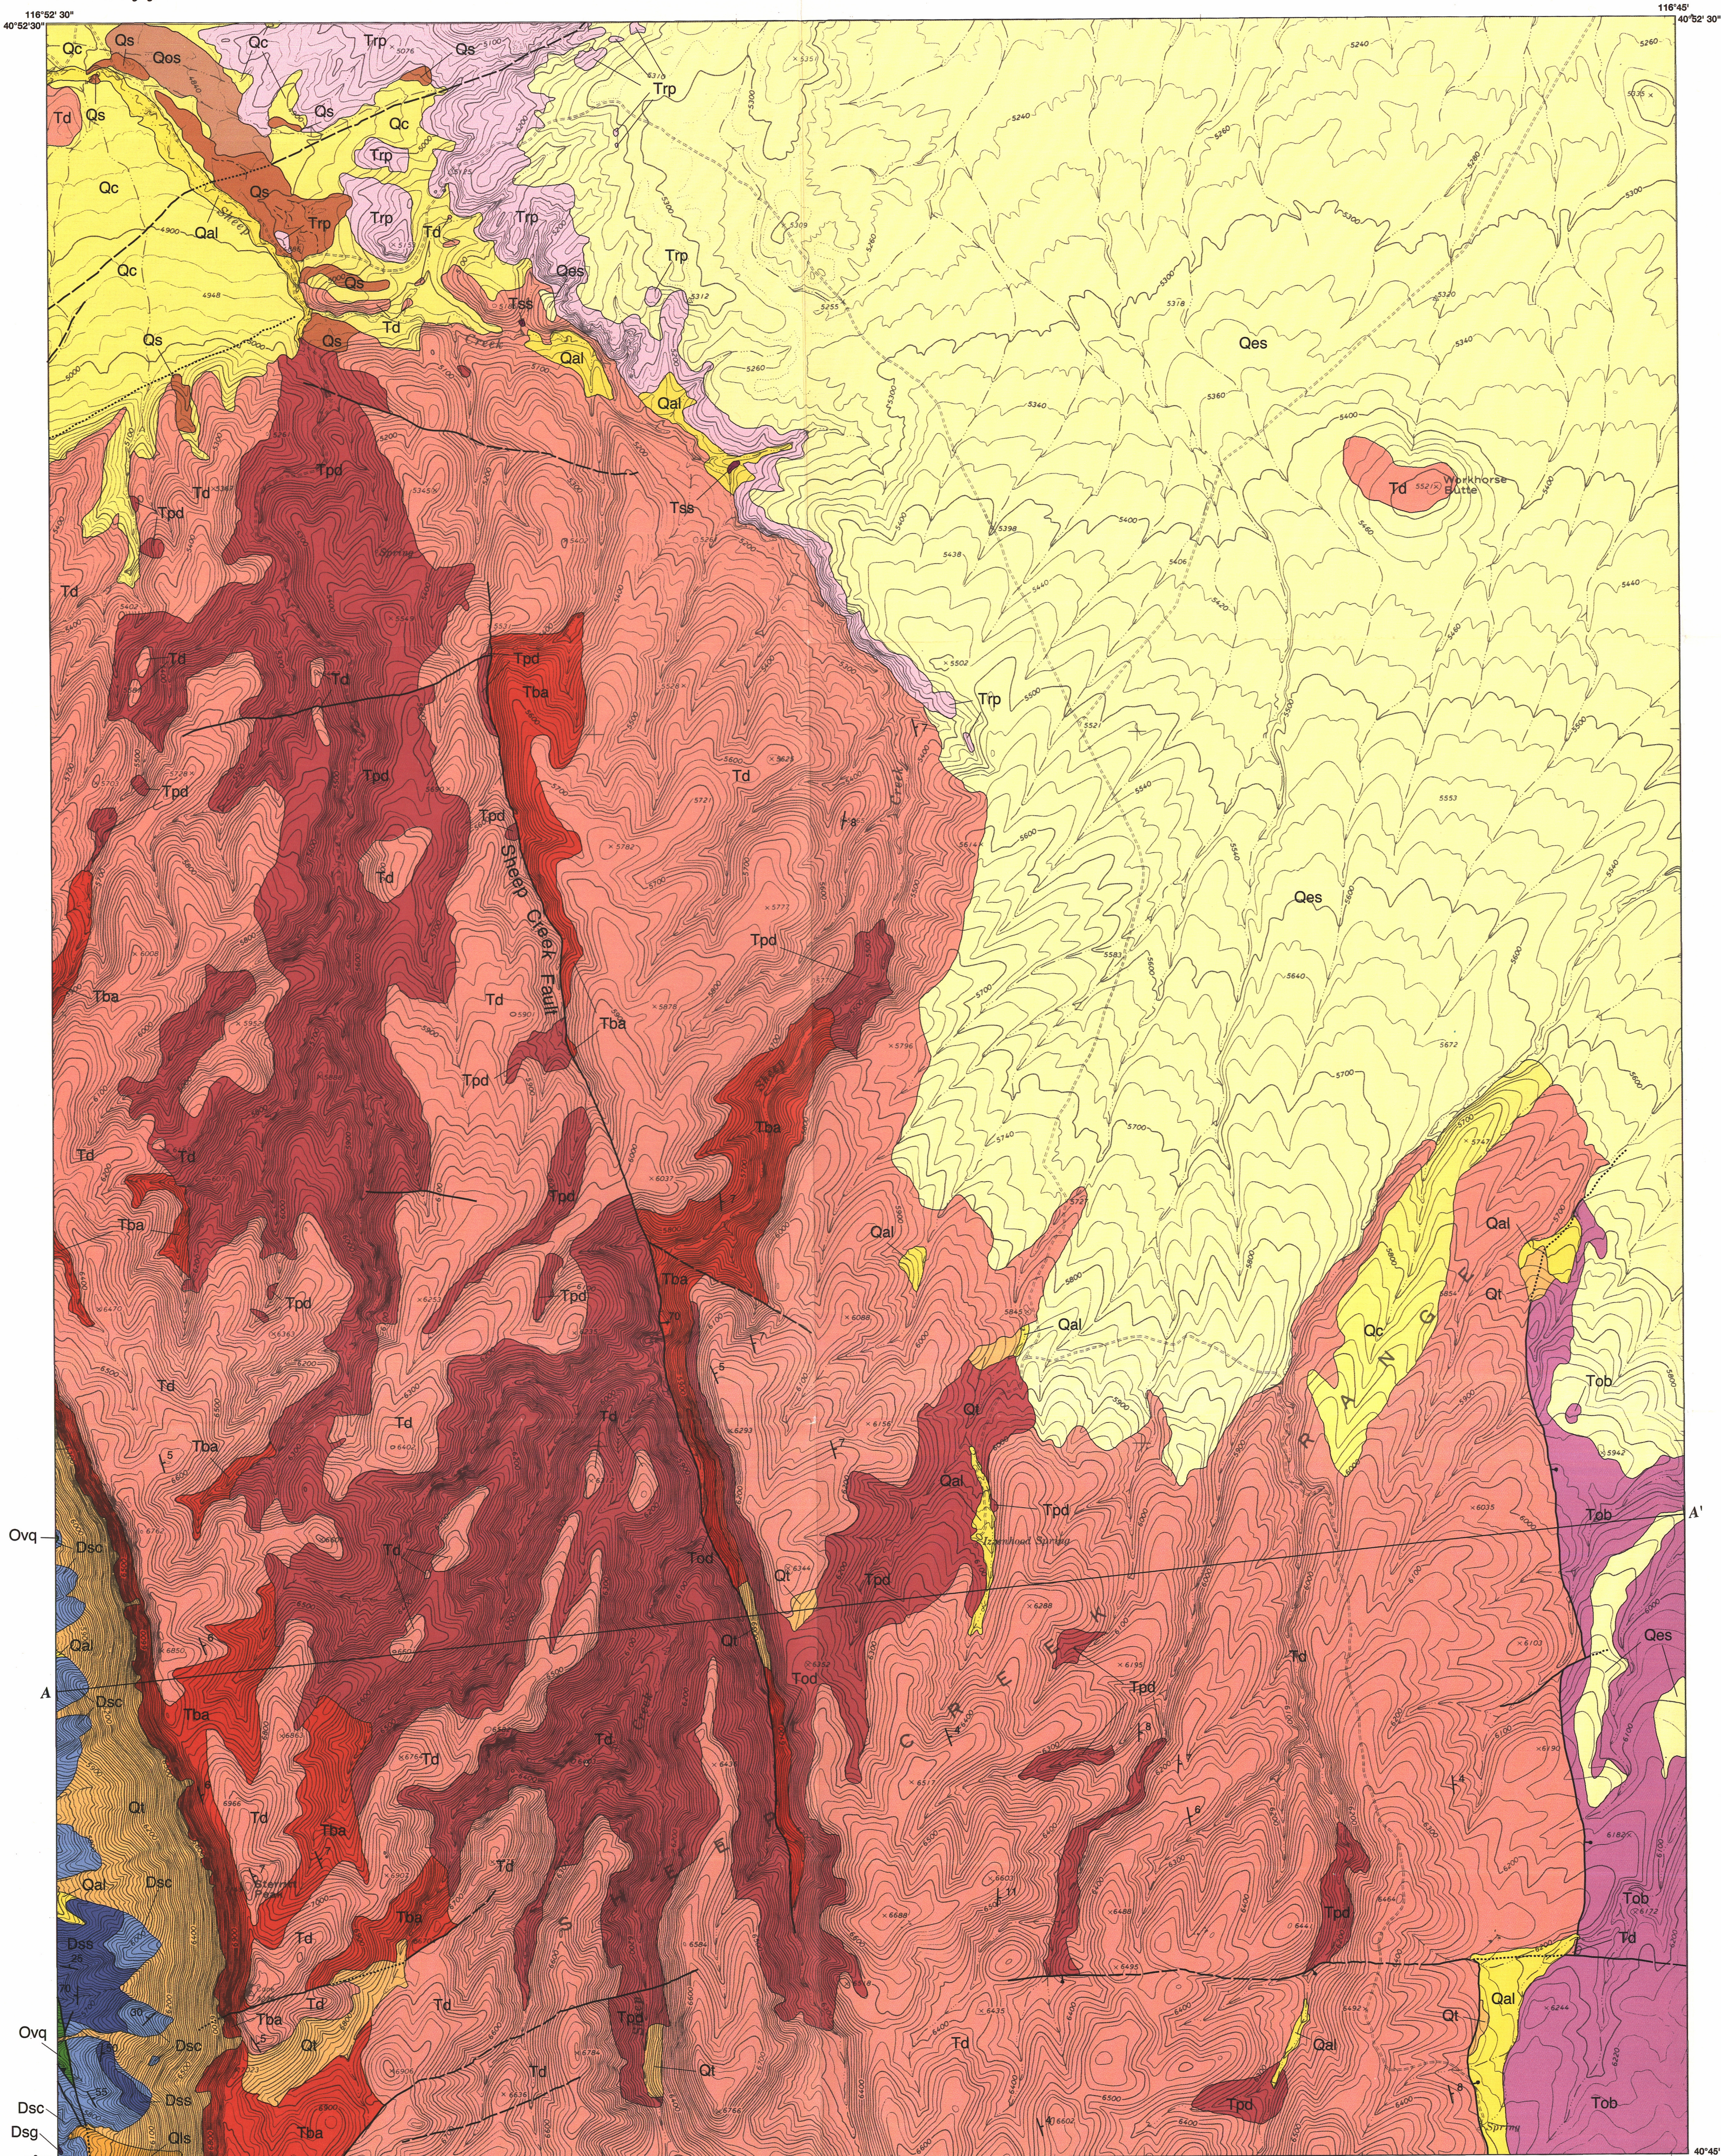

Base from U.S. Geological Survey, 1965  
Universal Transverse Mercator projection

15°  
TRUE NORTH  
MAGNETIC NORTH  
APPROXIMATE MEAN  
DECLINATION, 2002

SCALE 1:24 000

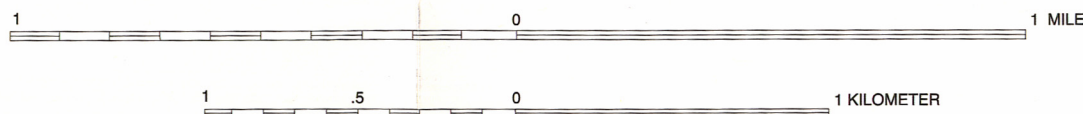

CONTOUR INTERVAL 20 FEET  
DOTTED LINES REPRESENT 10-FOOT CONTOURS

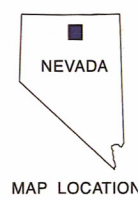

INTERIOR—GEOLOGICAL SURVEY, RESTON, VA—2002  
Geology by David A. John, 1997-98, 2000 and Chester  
T. Wruicke, 1996-97  
Editing and cartographic layout by Jane S. Ciener;  
Digital cartography by Barry Moring  
Manuscript approved for publication October 20, 1998

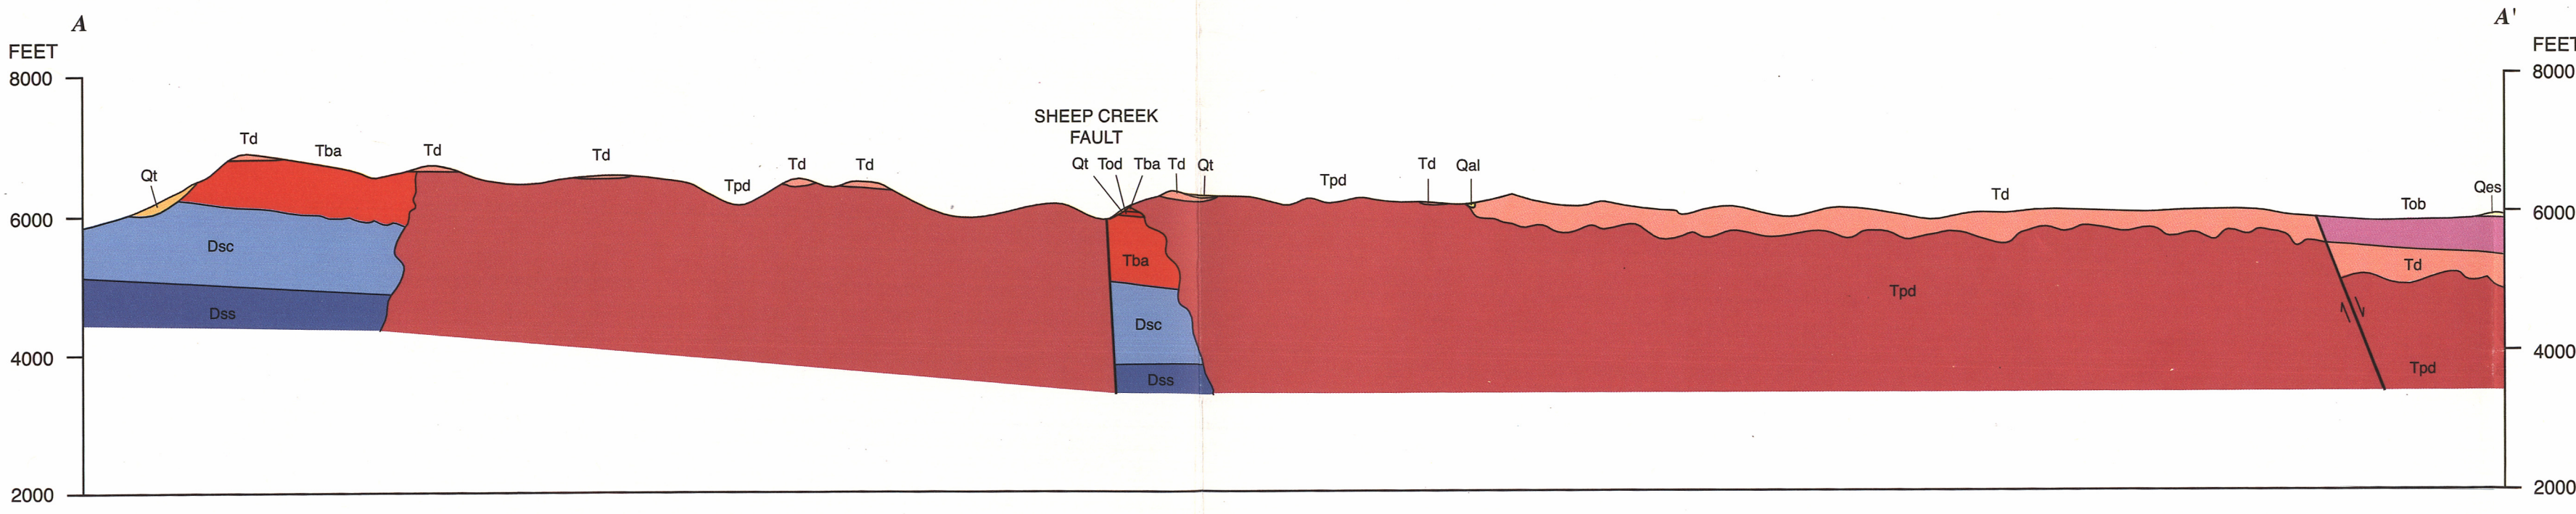

Supplement: Supplementary file 1 [file 1]
